# Supplementary material
Source: PubMed Central journal article supplement (PMC9667711)

**A**

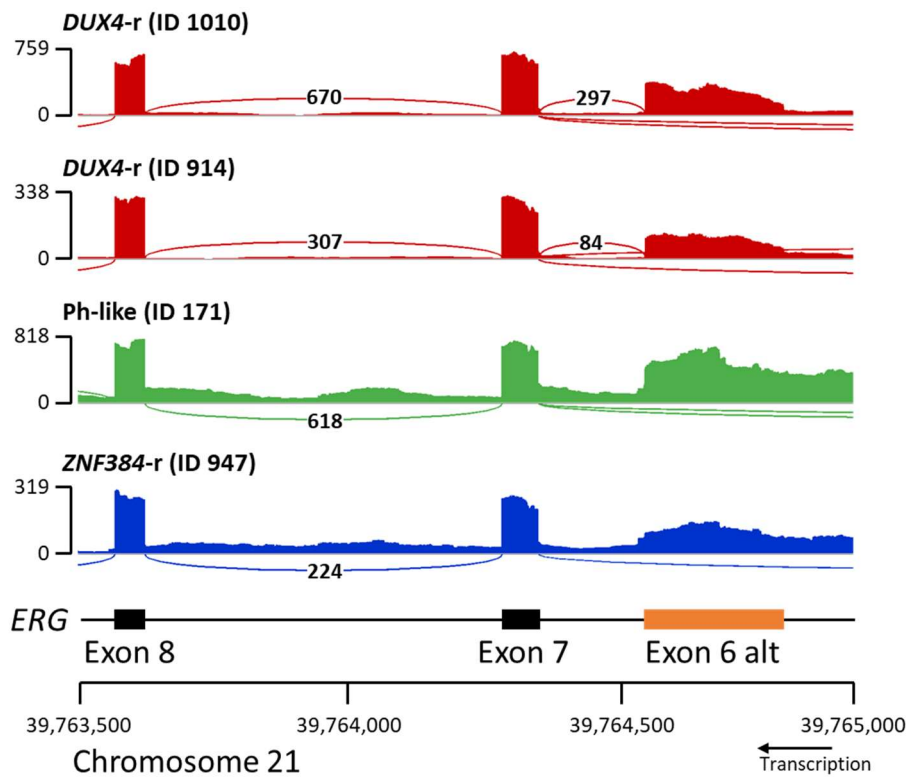

**B**

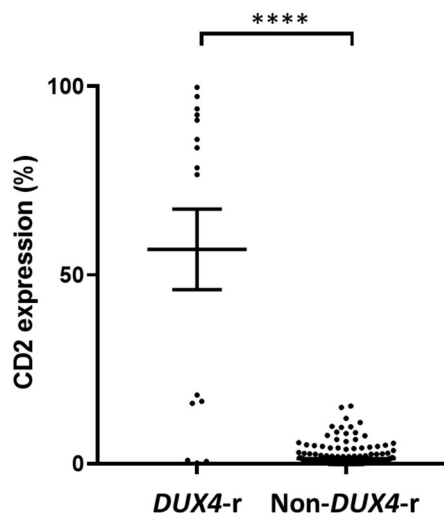

Supplement: mmc2.pdf [file mmc2.pdf]

**A**

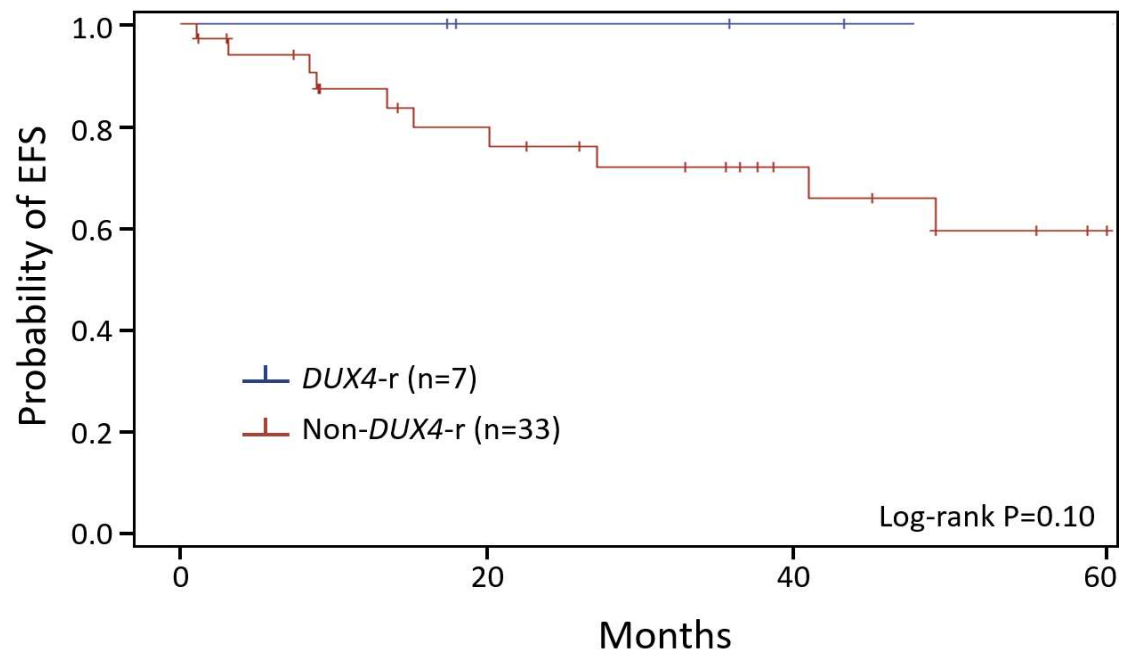

**B**

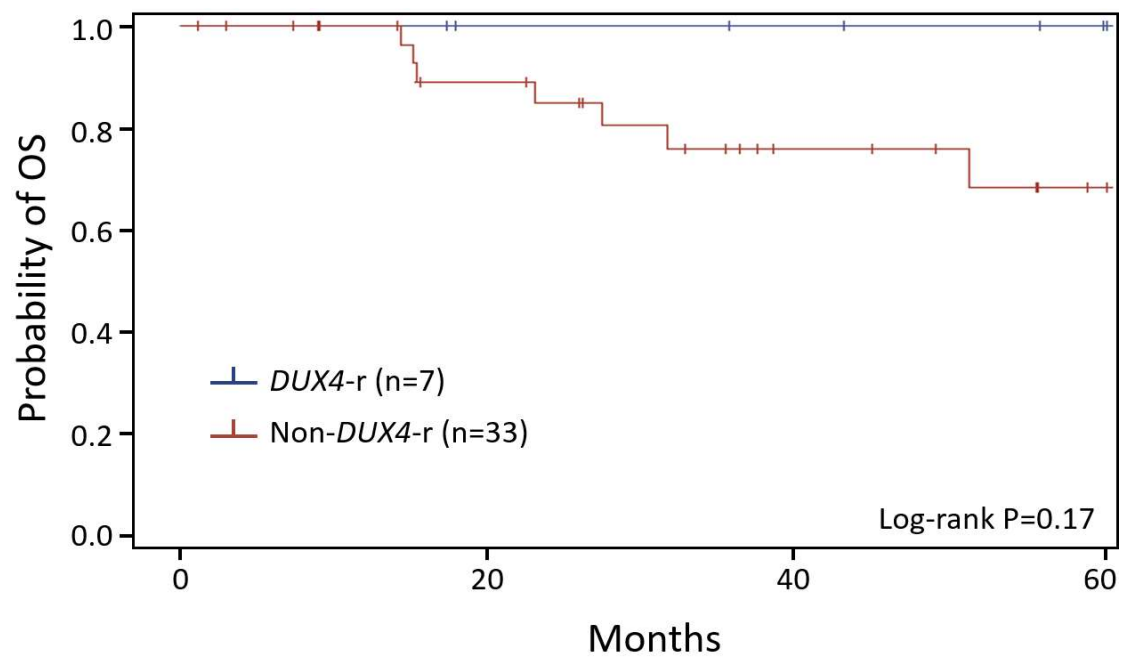

Supplement: mmc3.pdf [file mmc3.pdf]

**A**

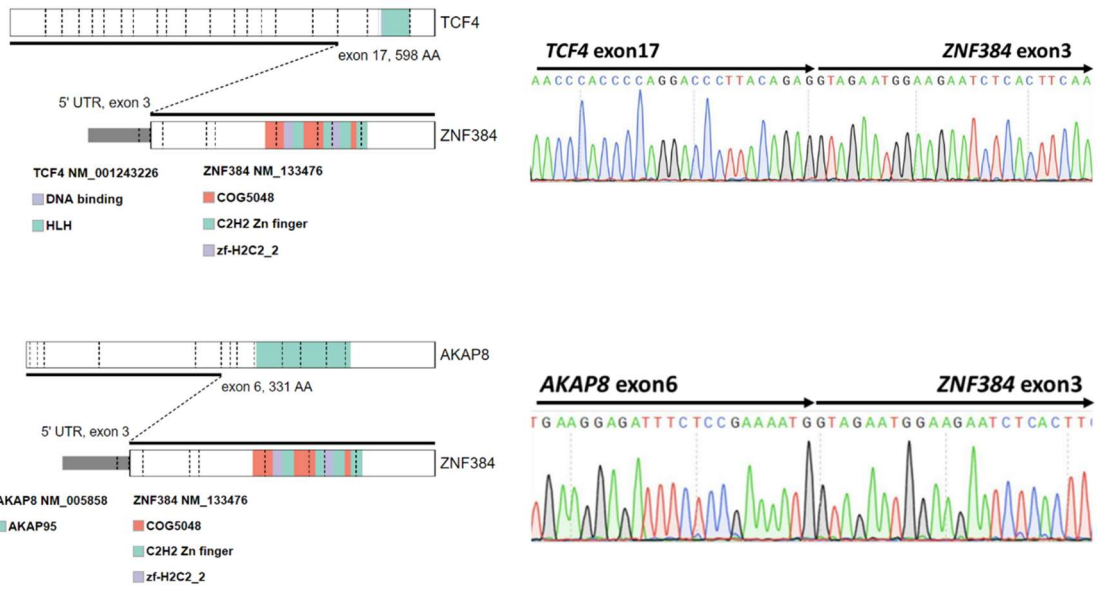

**B**

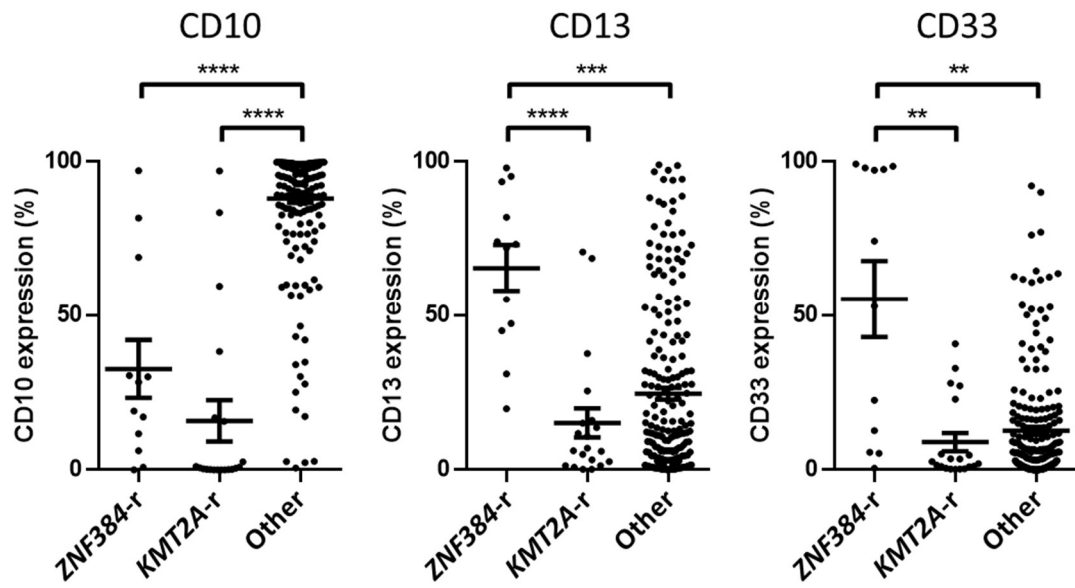

Supplement: mmc4.pdf [file mmc4.pdf]

A

**ID 929**

ETV6 p.103\_104insR

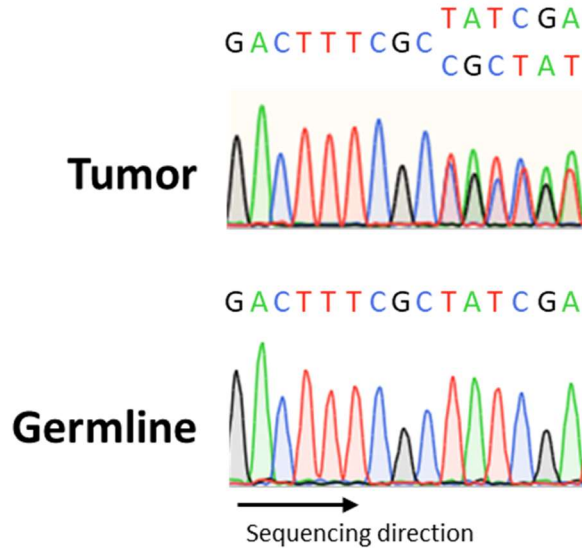

B

**ID 947**

ETV6 p.K302Gfs\*

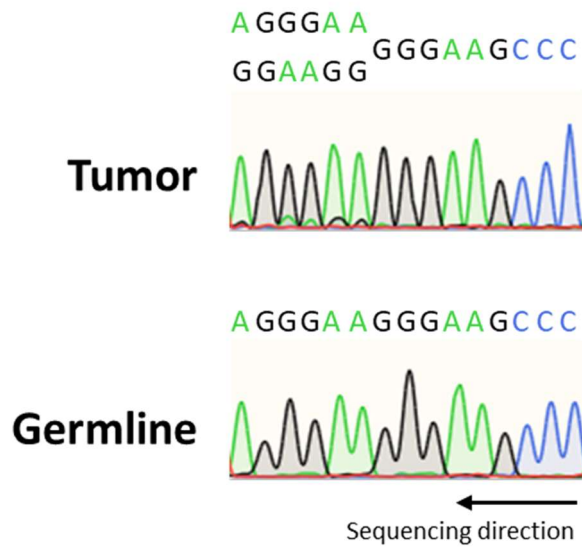

Supplement: mmc5.pdf [file mmc5.pdf]

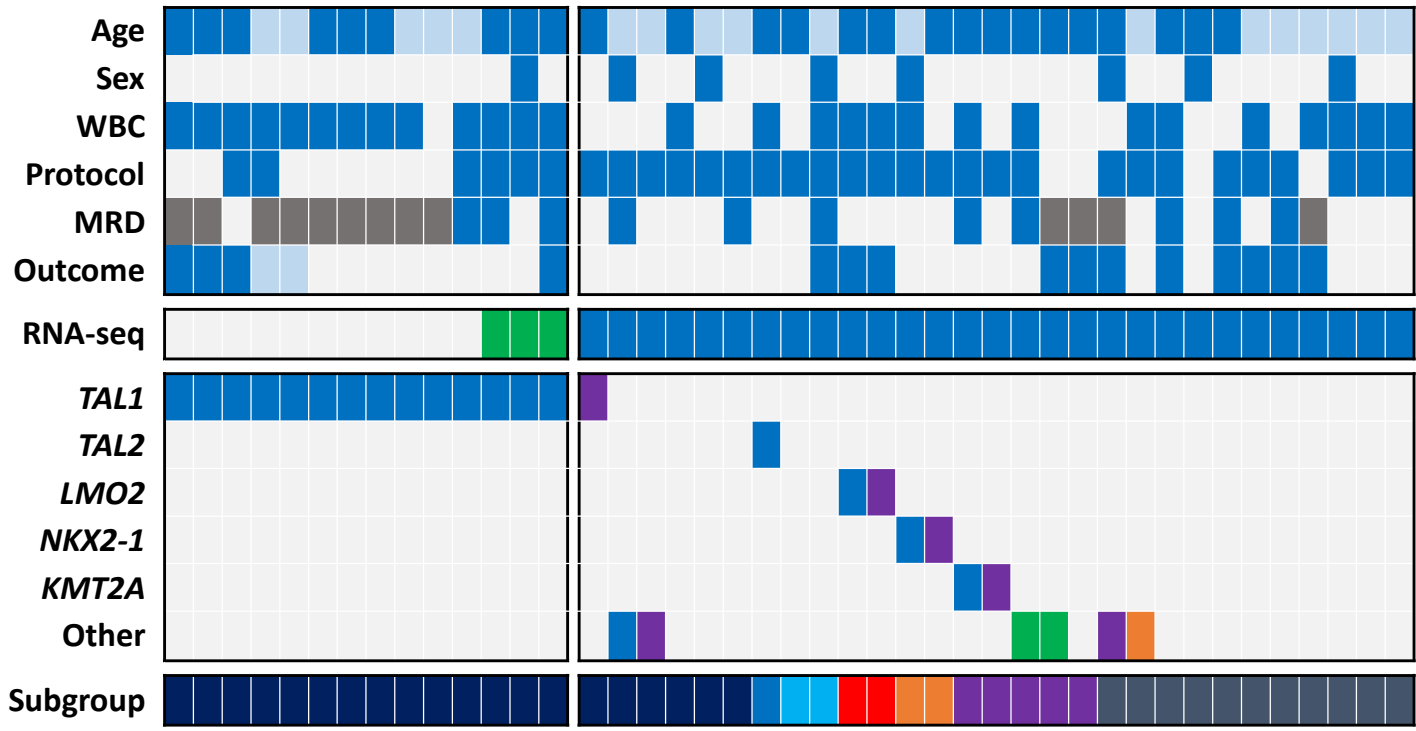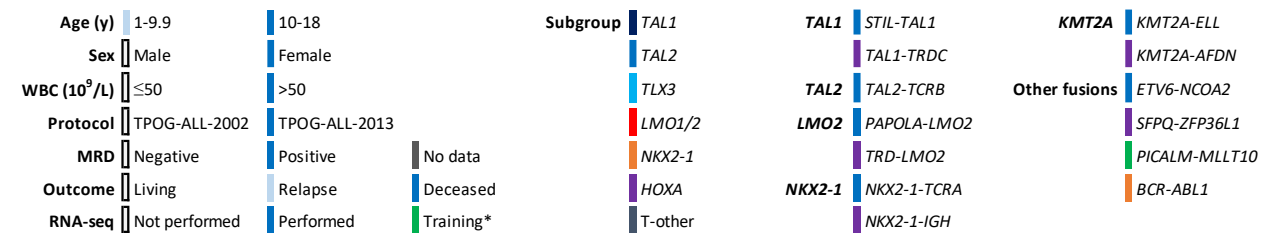

Supplement: mmc6.pdf [file mmc6.pdf]
